# Supplementary figures and images for: Construction of a prognostic model for gastric cancer based on immune infiltration and microenvironment, and exploration of MEF2C gene function
Source: PubMed Central journal article supplement — BMC Med Genomics. 2025 Jan 14;18:13. doi: 10.1186/s12920-024-02082-4 (PMC11734330; doi:10.1186/s12920-024-02082-4), 2025-01-14

A

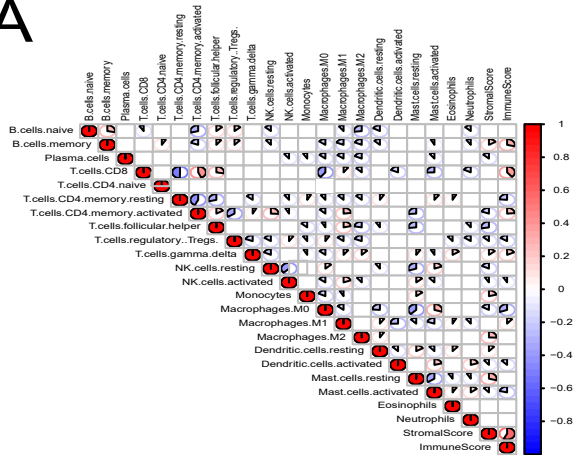

B

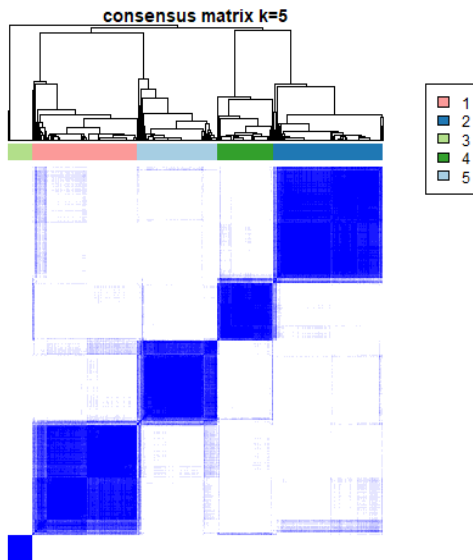

C

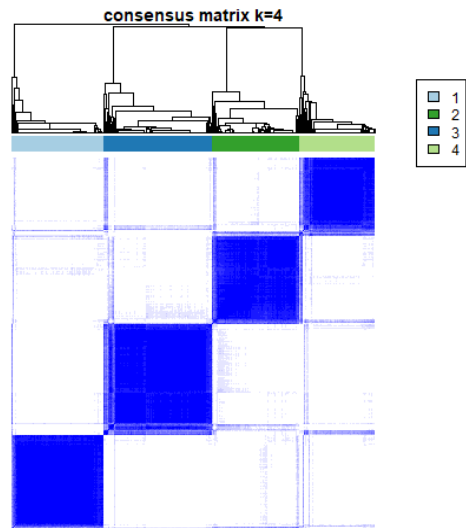

Supplement: 12920_2024_2082_MOESM1_ESM.pdf [file 12920_2024_2082_MOESM1_ESM.pdf]

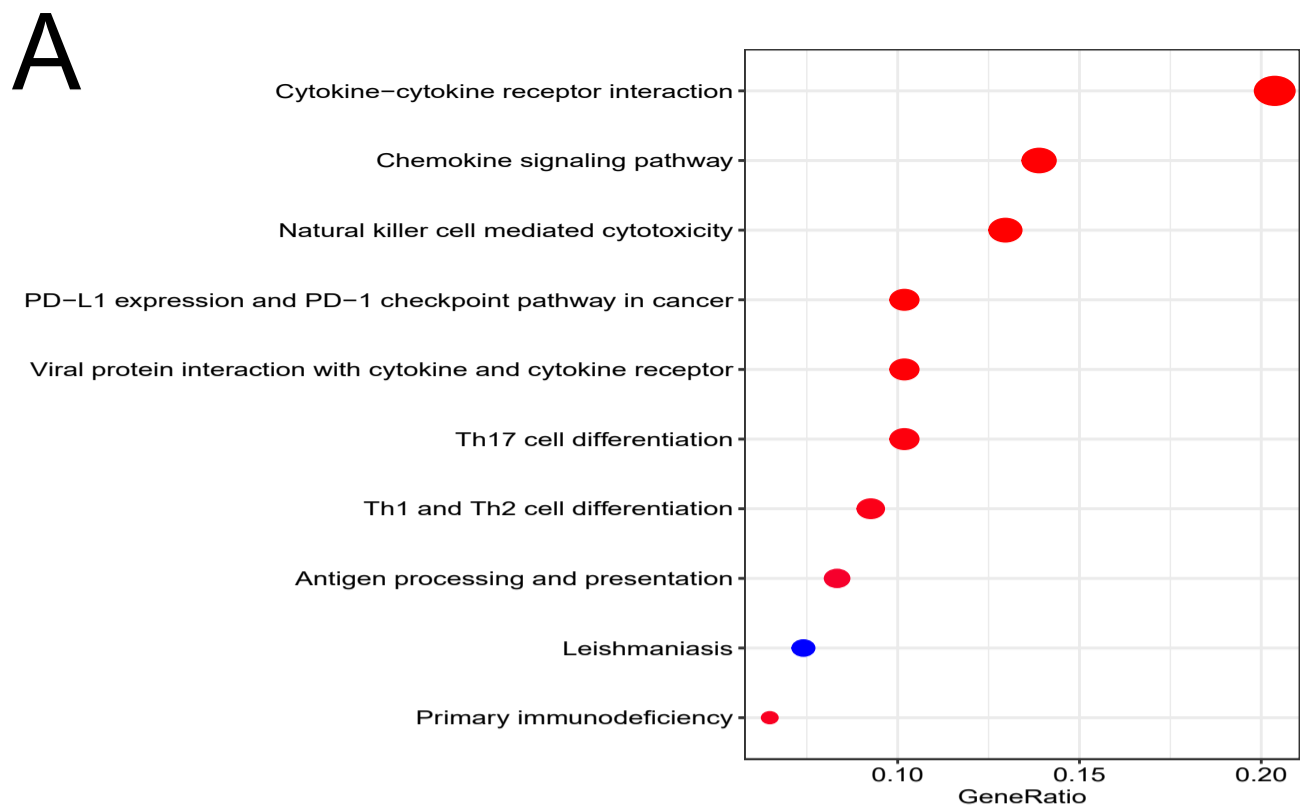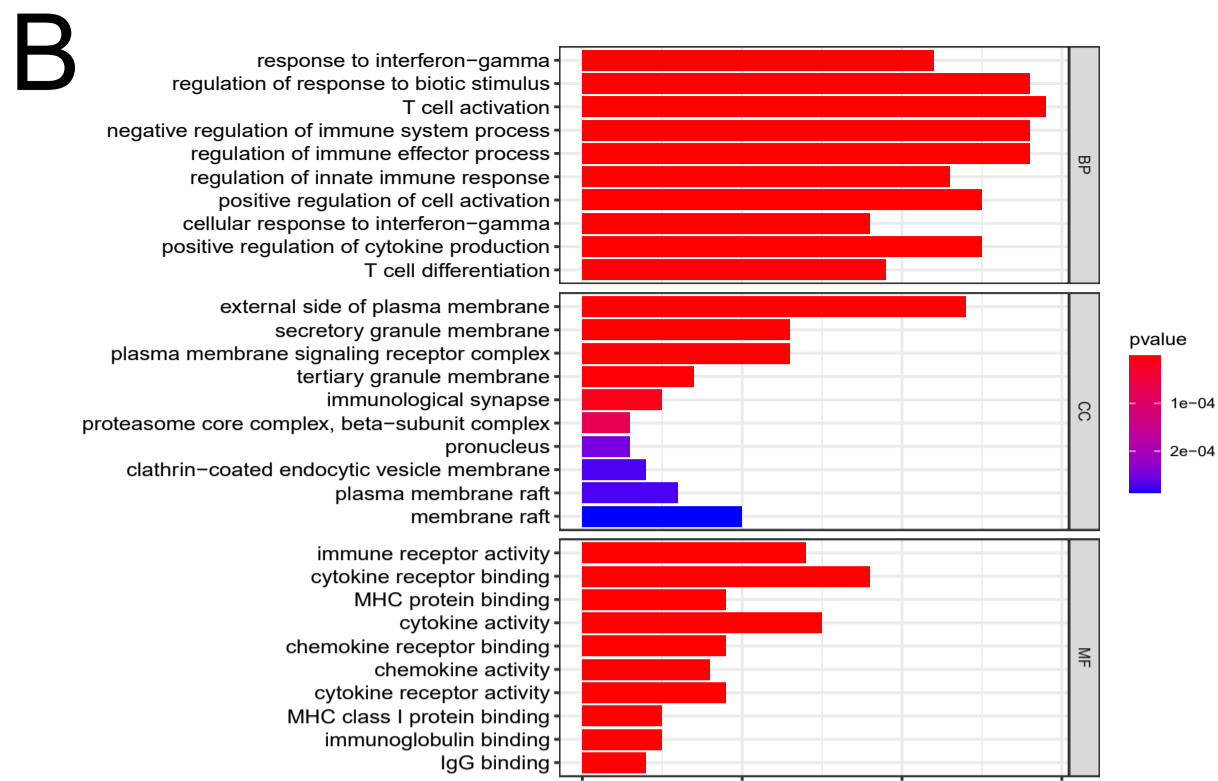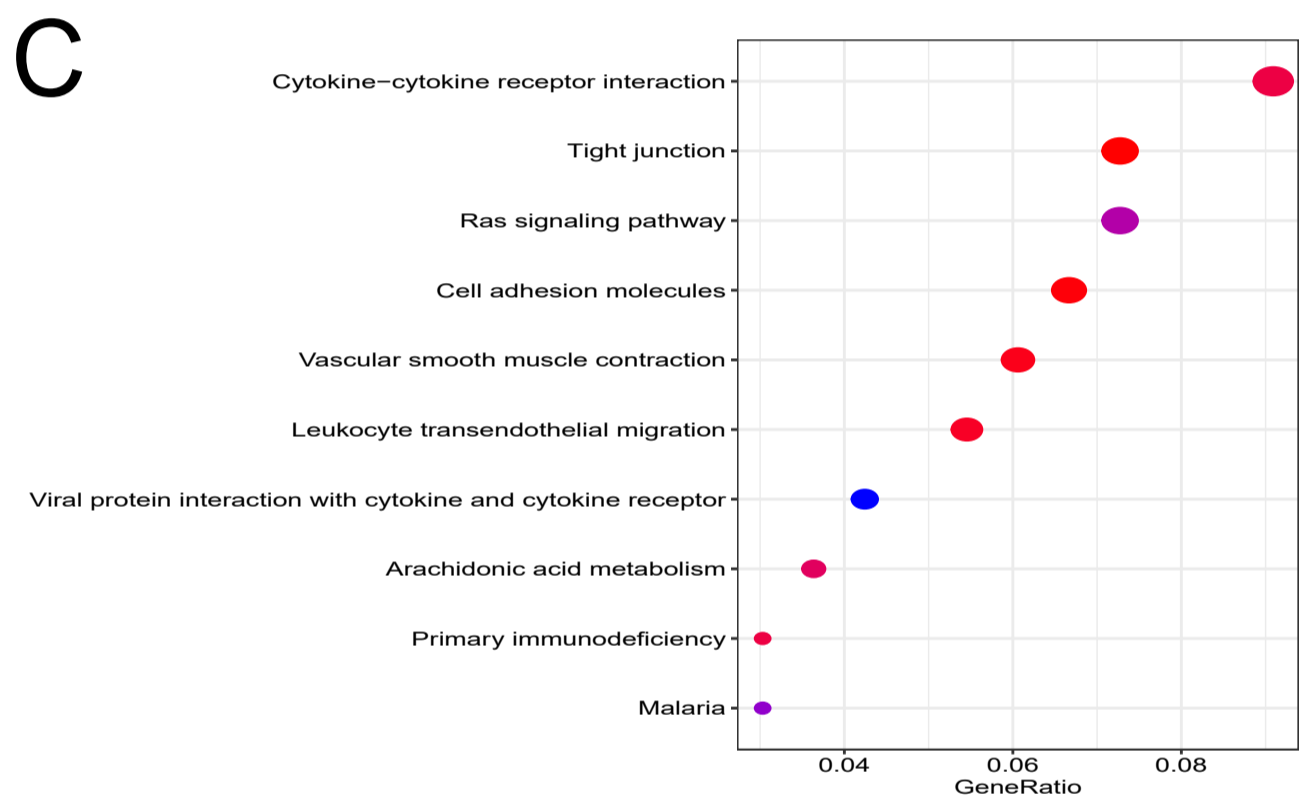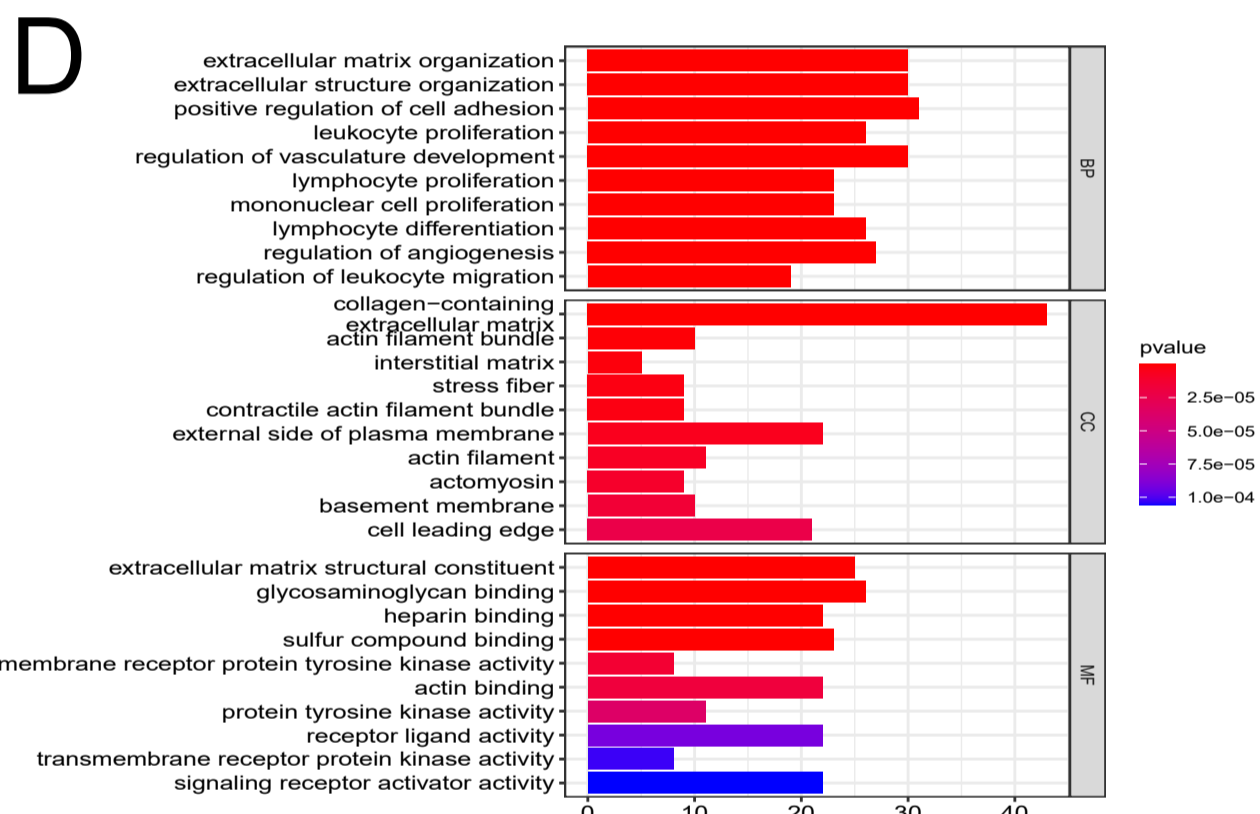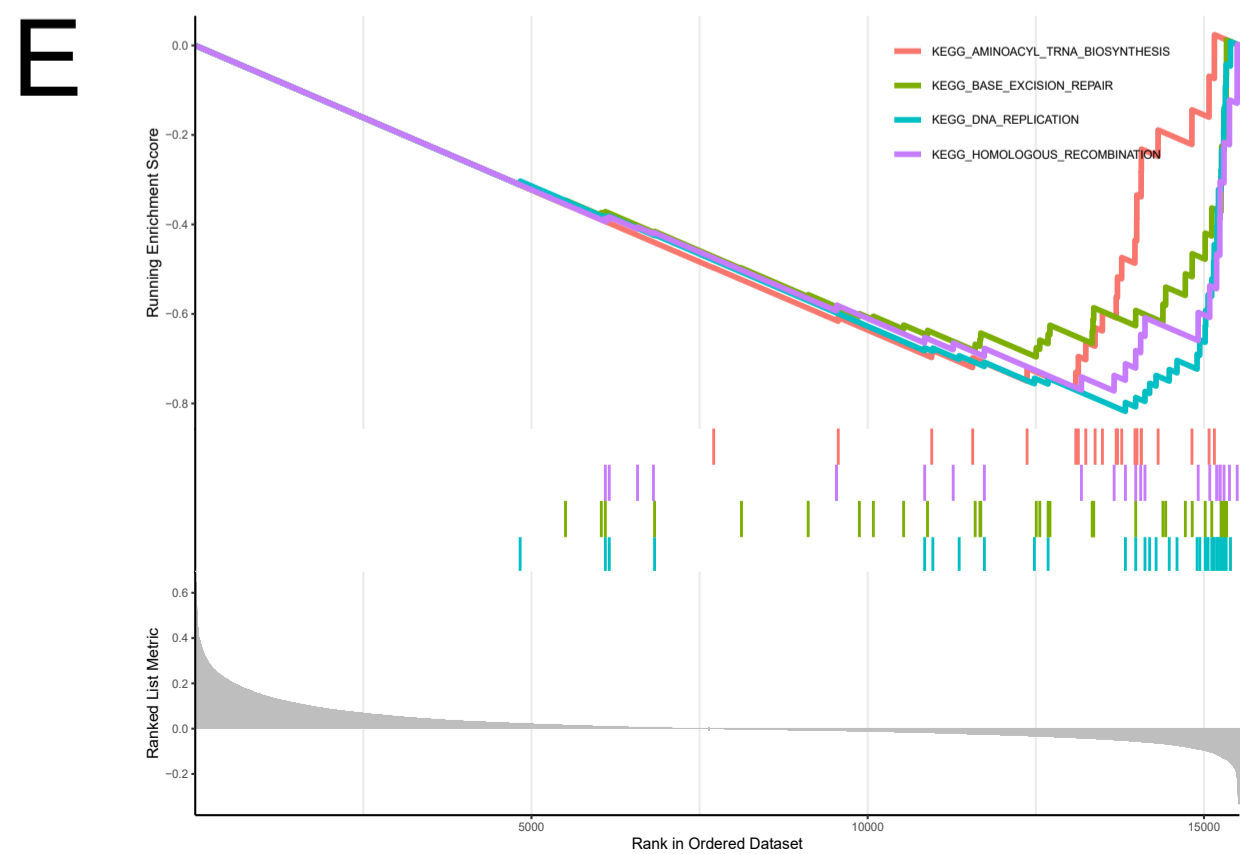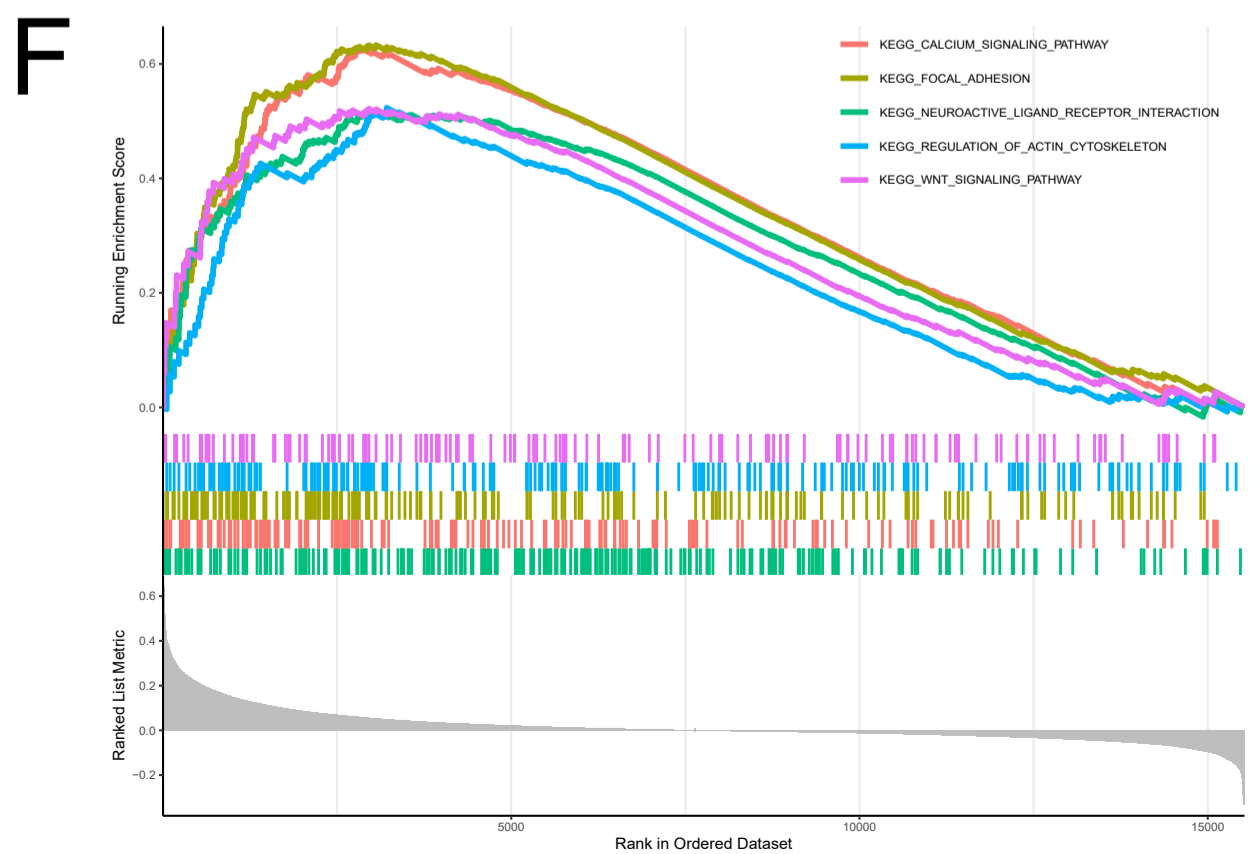

Supplement: 12920_2024_2082_MOESM2_ESM.pdf [file 12920_2024_2082_MOESM2_ESM.pdf]
